# Supplementary material for: CCP1 promotes mitochondrial fusion and motility to prevent Purkinje cell neuron loss in pcd mice
Source: PubMed Central journal article supplement — J Cell Biol. 2019 Jan 7;218(1):206–19. doi: 10.1083/jcb.201709028 (PMC6314562; doi:10.1083/jcb.201709028), 2019-01-07
Supplement: JCB_201709028_sm.pdf [file JCB_201709028_sm.pdf]

## Supplemental material

Gilmore-Hall et al., <https://doi.org/10.1083/jcb.201709028>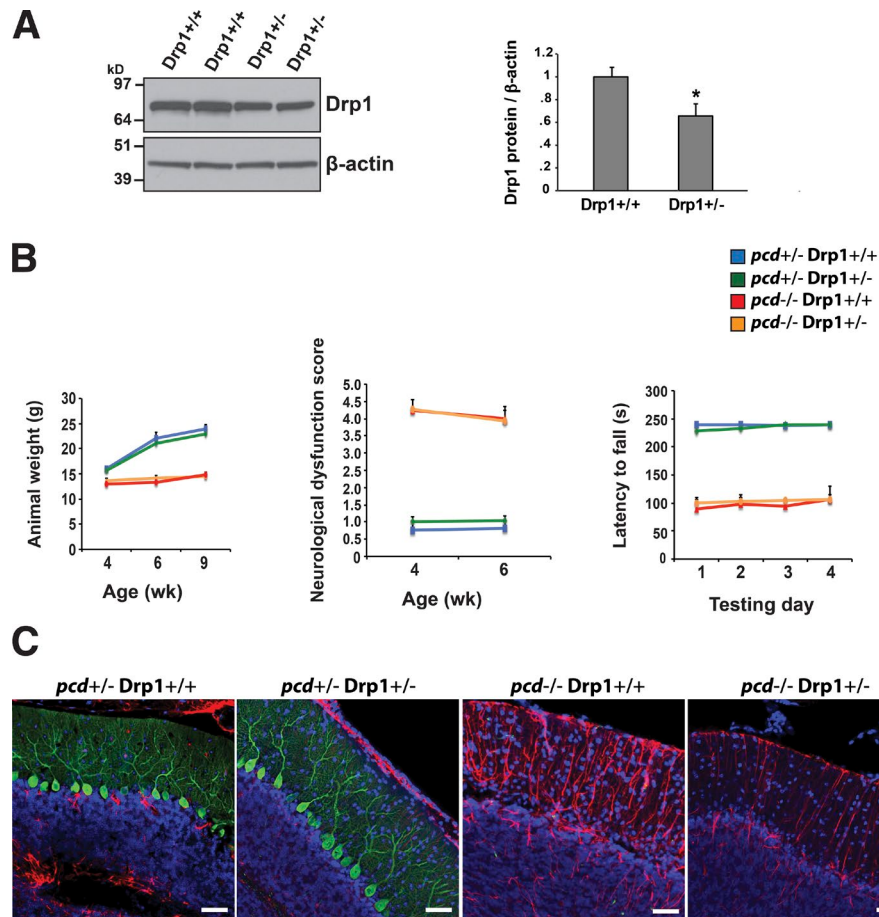

Figure S1. **Dosage reduction of Drp1 does not rescue *pcd* phenotypes.** (A) Immunoblot analysis of Drp1 protein expression in cerebellar protein lysates from *Drp1*<sup>+/+</sup> or *Drp1*<sup>-/-</sup> mice, with densitometry analysis of CCP1 expression relative to β-actin expression for *n* = 3 replicates, shown on right. *t* test: *P* < 0.05. (B) Phenotype and behavioral analysis of the indicated *pcd* × *Drp1* genotypes including weight, neurological examination, and accelerating rotarod. Reduced Drp1 dosage did not affect any of these readouts in *pcd* homozygous mice. (C) Immunohistochemistry of cerebellar sections from 3-mo-old *pcd* × *Drp1* mice reveals no benefit from reduced Drp1 dosage in *pcd* homozygous mice. Green indicates calbindin, red indicates GFAP, and blue indicates Hoechst 33342. Bars, 25 μm. Error bars are SEM.

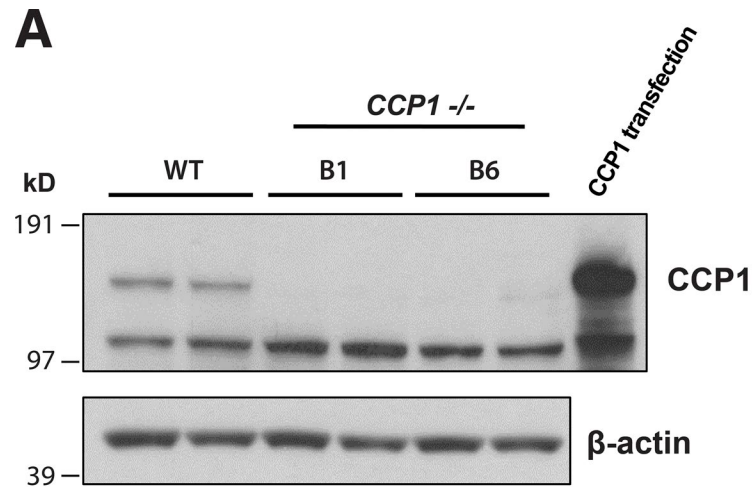

**B**

| CCP1-KO cell line | Mutations                        |
|-------------------|----------------------------------|
| B1                | 1 bp insertion; 207 bp insertion |
| B6                | 1 bp insertion; 3 bp deletion    |

Figure S2. **Validation of CCP1 knockout RPE1 cell lines.** (A) Immunoblot analysis of CCP1 expression in WT RPE1 cells and in two different CCP1 null RPE1 cell lines confirms absence of CCP1 protein expression. The CCP1-transfected HEK293 cell protein lysates served as a positive control for CCP1 detection. (B) Results of sequencing of CCP1 genes in CRISPR/Cas9 targeted null cell lines reveal the mutational basis of each knockout cell line.

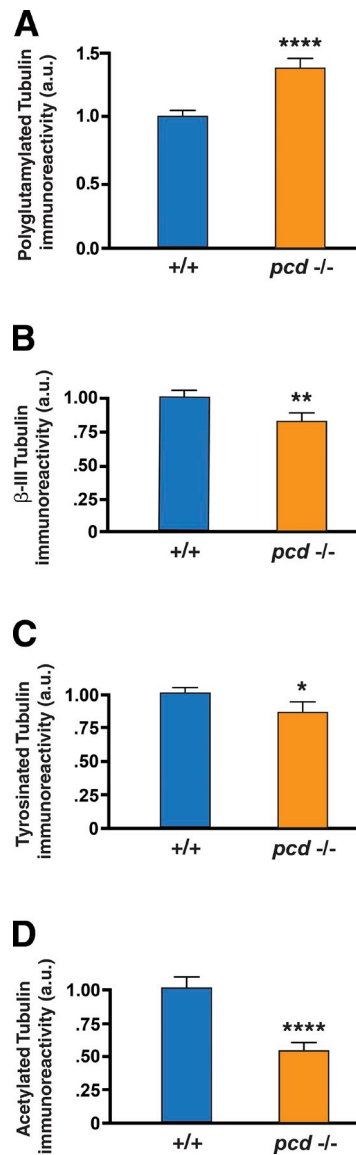

**Figure S3. Loss of CCP1 results in significant changes in the levels of tubulin PTMs.** (A) Quantification of polyglutamylated tubulin immunoreactivity in Purkinje cell neurons of 23-d-old WT (+/+) littermate control mice and *pcd* homozygous (-/-) mice from Fig. 7 C. Immunoreactivity for +/+ mice was arbitrarily set to 1. *n* = 3 mice per genotype; *n* ≥ 60 Purkinje cells per genotype. (B) Quantification of βIII-tubulin immunoreactivity in Purkinje cell neurons of 23-d-old WT (+/+) littermate control mice and *pcd* homozygous (-/-) mice from Fig. 4 D. Immunoreactivity for +/+ mice was arbitrarily set to 1. *n* = 3 mice per genotype; *n* ≥ 30 Purkinje cells per genotype. (C) Quantification of tyrosinated tubulin immunoreactivity in Purkinje cell neurons of 23-d-old WT (+/+) littermate control mice and *pcd* homozygous (-/-) mice from Fig. 7 E. Immunoreactivity for +/+ mice was arbitrarily set to 1. *n* = 3 mice per genotype; *n* ≥ 35 Purkinje cells per genotype. (D) Quantification of acetylated tubulin immunoreactivity in Purkinje cell neurons of 23-d-old WT (+/+) littermate control mice and *pcd* homozygous (-/-) mice from Fig. 7 F. Immunoreactivity for +/+ mice was arbitrarily set to 1. *n* = 3 mice per genotype; *n* ≥ 25 Purkinje cells per genotype. Two-tailed *t* test: \*, *P* < 0.05; \*\*, *P* < 0.01; \*\*\*\*, *P* < 0.0001. Error bars are SEM.

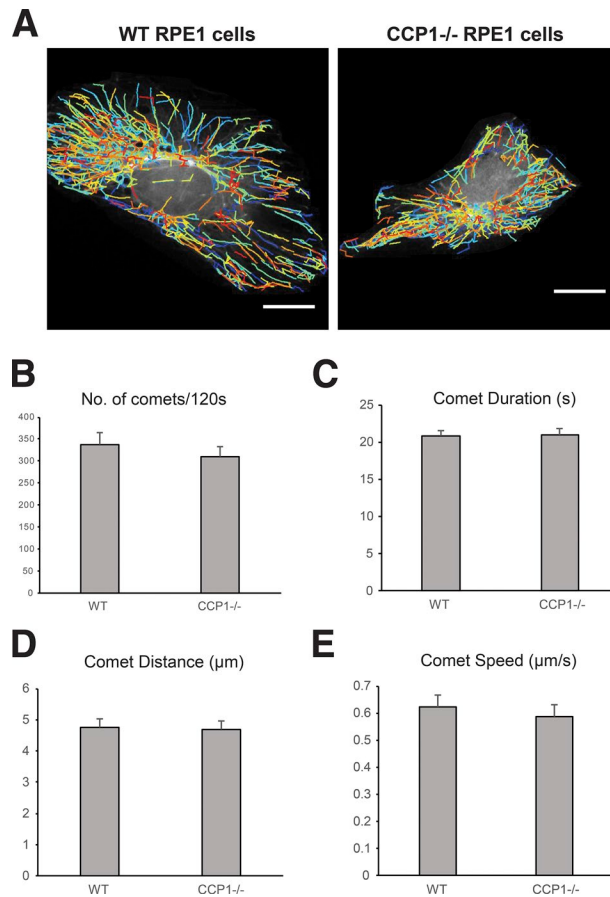

Figure S4. **The Eb1-GFP comet assay indicates normal nascent MT formation in CCP1 null cells.** (A) Stacked tracks from 120 s of live imaging of Eb1-GFP in either WT or *nna1Δ* RPE1 cells. Colors represent order of tracks in time lapse; blue indicates early, and red indicates late. Bars, 20 μm. (B–E) Quantification analysis using ImageJ-based Trackmate to determine the average number of comets per 120 s (B), mean comet duration (C), mean comet displacement (D), and mean comet speed (E). All of these parameters were similar between WT cells and CCP1<sup>-/-</sup> cells. *n* = 25–27 cells per genotype. Error bars are SEM.

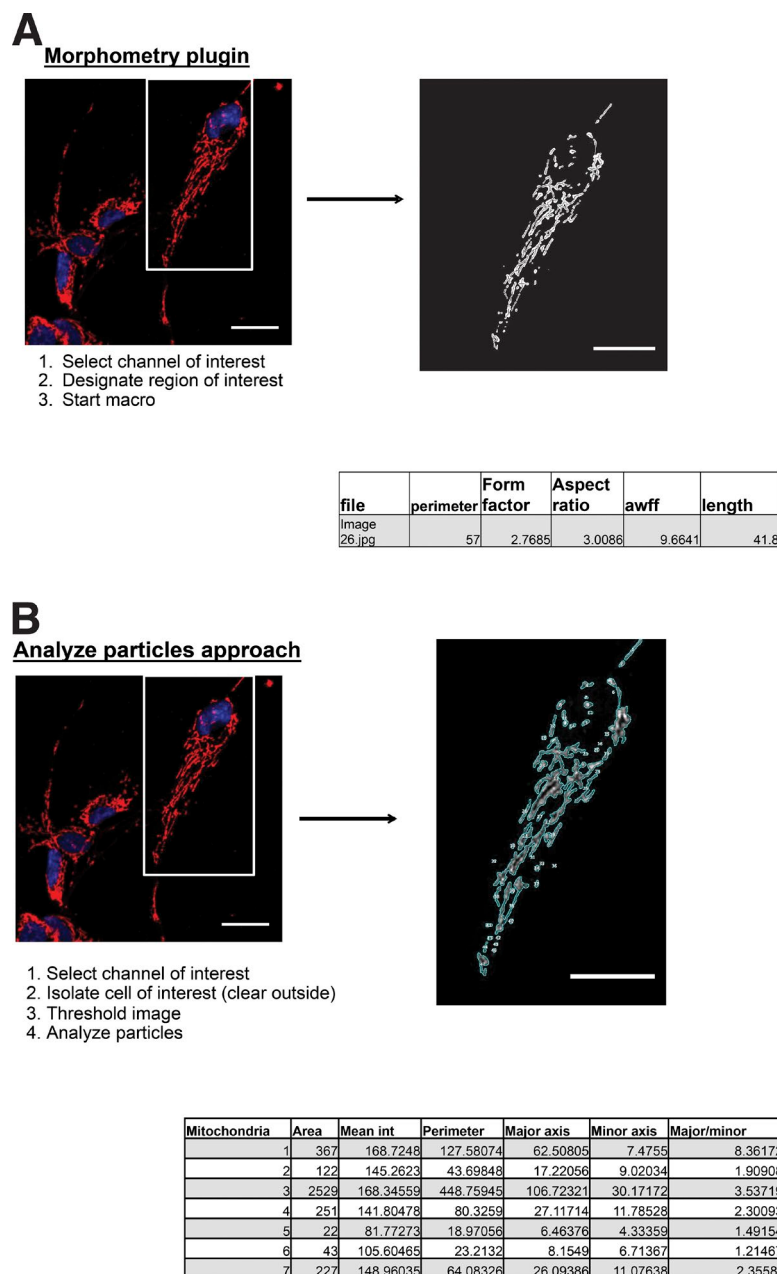

Figure S5. **Algorithms employed to quantify mitochondrial morphology characteristics and detect mitochondrial fragmentation.** (A) We employed an ImageJ-based morphometry algorithm to calculate mitochondrial perimeter, form factor, area-weighted form factor (awff), and aspect ratio in each individual retinal pigmented epithelial cell immunostained with Tomm20 (red) and Hoechst 33342 (blue). (B) We employed an ImageJ-based particle analysis algorithm to measure the area of each mitochondrion in an individual retinal pigmented epithelial cell immunostained with Tomm20 (red) and Hoechst 33342 (blue). We classified a cell as consisting of fragmented mitochondria when >50% of the mitochondria exhibited an area value <200. Bars, 20  $\mu$ m.
